# Supplementary material for: Has Selection for Improved Agronomic Traits Made Reed Canarygrass Invasive?
Source: PLoS One. 2011 Oct 3;6(10):e25757. doi: 10.1371/journal.pone.0025757 (PMC3185028; doi:10.1371/journal.pone.0025757)
Supplement: Table S1 — SSR primer sequences. Sequences of the 15 SSR primers used in the genetic analysis. (XLS) [file pone.0025757.s001.xls]

## Sheet: SSR Primers
Marker	Motif	# Alleles	Forward Sequence	Reverse Sequence	Original Species
csm045	(AG)	7	TAACGAAGGCAATTCAGAGAGA	GGAAGCAGAAAAGCTGCAAG	Phalaris canariensis
csm049	(AG	6	TGTGGAAAGTTGGAACTTGG	TCAACCATGCTACTCAAAATCAA	Phalaris canariensis
csm071	(AG)	7	AAAGATCCACCACAAAATGTGA	CCACCTCTAGACTACGGGTTTG	Phalaris canariensis
csm074	(AG)	3	CACGGGGTGAGAAATCACAT	TCCTCTCCAAGATCGTCACC	Phalaris canariensis
csm075	(AG)	13	TGAAAACTGATCACAACCATGC	TCACGGGACGTACATTGTGT	Phalaris canariensis
csm090	(AG)	5	TGGATTTAGTGTTTGCAATGAA	CACCTTCTTCCACCTTGGAG	Phalaris canariensis
csm101	(AG)	3	GAACACCCCAGACGTAGCAT	CTGTCACCTCCCGACTGATT	Phalaris canariensis
csm104	(AG)	2	GCCCTTGTCTCTAGCATTCG	GCGCCTCTCATATCACCTCT	Phalaris canariensis
csm106	(AG)	15	ACGTTGTGTGGGTGAAGACA	AAAGCTGATCACAACCATGC	Phalaris canariensis
csm111	(AG)	3	CTGTGGAAATCAGCAATCCA	CCAAGCAAGTTGCGGTAGAC	Phalaris canariensis
csm122	(AG)	7	TGCTAGTGAGCTTGTCTACTCCTC	CAGACCTTGACCAAGGAAGC	Phalaris canariensis
phi071	(GGA)	5	GGAGTTCATCAGCTACCCCATCT	TTCTGCTTGTTGATCTGCACCCAC	Zea mays
umc2185	(CGC)	9	CTTCTTCTGCCACAGCACGAAC	CAAGGTTAAGAGCATGTACGCGAT	Zea mays
umc2272	(GCG)	3	GGAGGAAGCACAAGTACATGCAG	CCTGAACTTGGTCTGCTTCTCTG	Zea mays
umc2779	(GGC)	3	GACATCTTGAAGAAGAGCTCAGGC	GAGGATGGATTCTGCAACTTCG	Zea mays
